## ERRATUM

For the article by Tsen *et al.* that appeared in the July 2000 issue of ANESTHESIOLOGY (2000; 93:148-51), the following appendix should have been included:

### Medication Questionnaire

The Department of Anesthesiology, Perioperative and Pain Medicine of the Brigham and Women's Hospital is interested in making your anesthetic experience safe and comfortable. Part of the safety factor is knowing what kinds of medications that you are on. While many people do not consider herbal and non prescription remedies to be medications, they sometimes affect the drugs that we use for anesthesia. Please fill out the following questionnaire, indicating the remedies that you have taken at any time during the last 3 months.

Name \_\_\_\_\_ Date \_\_\_\_\_

Age ☐ < 20 ☐ 20-30 ☐ 31-40 ☐ 41-50 ☐ 51-60 ☐ 61-70 ☐ 71-80 ☐ > 80

Sex ☐ Male ☐ Female

| Prescription Drugs (Write in Please) | Medication               | Dose  |
|--------------------------------------|--------------------------|-------|
| Breathing Medications?               | <input type="checkbox"/> | _____ |
| Blood Pressure Medications?          | <input type="checkbox"/> | _____ |
| Blood Thinning Medications?          | <input type="checkbox"/> | _____ |
| Heart Medications?                   | <input type="checkbox"/> | _____ |
| Pain Medications?                    | <input type="checkbox"/> | _____ |
| Diabetes Medications?                | <input type="checkbox"/> | _____ |
| Thyroid Medications?                 | <input type="checkbox"/> | _____ |
| Other Medications?                   | <input type="checkbox"/> | _____ |

| Non Prescription Drugs (Write in Please)         | Medication               | Dose  |
|--------------------------------------------------|--------------------------|-------|
| Cold Remedies?                                   | <input type="checkbox"/> | _____ |
| Headache/Pain Relievers? (Tylenol, Motrin, etc.) | <input type="checkbox"/> | _____ |
| Stomach Medications? (Pepsid, Mylanta, etc.)     | <input type="checkbox"/> | _____ |
| Vitamins? (see attached sheet)                   | <input type="checkbox"/> | _____ |
| Other Non-Prescription Medications?              | <input type="checkbox"/> | _____ |

### Herbal Remedies

|                                                            |                                                                 |
|------------------------------------------------------------|-----------------------------------------------------------------|
| <input type="checkbox"/> Aloe (Aloe Barbadensis)           | <input type="checkbox"/> Kava Kava                              |
| <input type="checkbox"/> Cranberry (Vaccinium Macrocarpon) | <input type="checkbox"/> Melatonin                              |
| <input type="checkbox"/> Comfrey                           | <input type="checkbox"/> Primrose Oil                           |
| <input type="checkbox"/> Echinacea                         | <input type="checkbox"/> Saw Pimetto (Serenoa Repens)           |
| <input type="checkbox"/> Garcia Cambogia                   | <input type="checkbox"/> Senna                                  |
| <input type="checkbox"/> Garlic (Allium Sativum)           | <input type="checkbox"/> Soy Extract                            |
| <input type="checkbox"/> Ginko Biloba                      | <input type="checkbox"/> St. John's Wort (Hypericum Perforatur) |
| <input type="checkbox"/> Ginseng (Panax Ginseng)           | <input type="checkbox"/> Other (Write In)                       |
| <input type="checkbox"/> Goldenseal (Hydrastis Canadensis) | <input type="checkbox"/> Other (Write In)                       |
| <input type="checkbox"/> Gotu Kola                         | <input type="checkbox"/> Other (Write In)                       |

How did you decide to start these?

|                                                               |
|---------------------------------------------------------------|
| <input type="checkbox"/> Health Care Provider Recommendation  |
| <input type="checkbox"/> Friend/Family Member Recommendation  |
| <input type="checkbox"/> Saw TV or Magazine/Newspaper Article |
| <input type="checkbox"/> Decided On Own to Start              |
